# Supplementary material for: Assessing Unmet Information Needs of Breast Cancer Survivors: Exploratory Study of Online Health Forums Using Text Classification and Retrieval
Source: PubMed Central journal article supplement (PMC5974460; doi:10.2196/cancer.9050), 2018-05-15
Supplement: cancer_v4i1e10_app2.pdf [file cancer_v4i1e10_app2.pdf]

**Multimedia Appendix 2: Inter Annotator Agreement Counts with Percentage Correct based on Final Distribution for each of the data sets**

Mayo Connect (MC) data set (1958 sentences)

| Category      | Annotator 1 | Annotator 2 | Agreement<br>(% Correct) |
|---------------|-------------|-------------|--------------------------|
| Medical       | 868         | 601         | 541 (96%)                |
| Resource      | 60          | 87          | 37 (43%)                 |
| Social        | 236         | 355         | 215 (61%)                |
| Psychological | 24          | 61          | 21 (34%)                 |
| Background    | 23          | 69          | 18 (26%)                 |
| Wellness      | 29          | 88          | 20 (23%)                 |
| Physical      | 174         | 168         | 103 (62%)                |
| Previous      | 32          | 147         | 16 (11%)                 |
| Other         | 413         | 322         | 185 (59%)                |
| Multiple      | 99          | 60          | 17 (28%)                 |

| Category            | Annotator 1 | Annotator 2 | Agreement<br>(% Correct) |
|---------------------|-------------|-------------|--------------------------|
| Information need    | 39          | 110         | 22 (20%)                 |
| No Information Need | 1919        | 1848        | 1831 (97%)               |

Many expressions of information need are indirect. The first version of the annotation guideline was not sufficiently clear regarding these cases and so it was revised after reviewing the ITA results for the MC dataset and before the CSN dataset was annotated.

Cancer Survivors Network (CSN) data set (2246 sentences)

| Category      | Annotator 1 | Annotator 2 | Agreement (% Correct) |
|---------------|-------------|-------------|-----------------------|
| Medical       | 389         | 465         | 364 (76%)             |
| Resource      | 95          | 33          | 32 (100%)             |
| Social        | 454         | 443         | 384 (87%)             |
| Psychological | 74          | 65          | 50 (79%)              |
| Background    | 159         | 38          | 34 (89%)              |
| Wellness      | 86          | 77          | 69 (89%)              |
| Physical      | 161         | 193         | 146 (76%)             |
| Previous      | 734         | 430         | 420 (99%)             |
| Other         | 542         | 727         | 454 (62%)             |

| Category            | Annotator 1 | Annotator 2 | Agreement (% Correct) |
|---------------------|-------------|-------------|-----------------------|
| Information need    | 159         | 196         | 135 (69%)             |
| No Information Need | 2087        | 2048        | 2025 (99%)            |

Cancer Survivors Network Random Sentences (CSN-R) data set (1000 sentences)

| Category            | Annotator 1 | Annotator 2 | Agreement (% Correct) |
|---------------------|-------------|-------------|-----------------------|
| Information need    | 33          | 30          | 23 (66%)              |
| No Information Need | 967         | 970         | 960 (99%)             |
