# Supplementary material for: Assessing Unmet Information Needs of Breast Cancer Survivors: Exploratory Study of Online Health Forums Using Text Classification and Retrieval
Source: PubMed Central journal article supplement (PMC5974460; doi:10.2196/cancer.9050), 2018-05-15
Supplement: cancer_v4i1e10_app3.pdf [file cancer_v4i1e10_app3.pdf]

### Multimedia Appendix 3: Comparisons of Classifier Algorithms

**MA3 Table 1:** The performance of a different classifiers on MC data using Naïve Bayes (NB), Support Vector Machines (SVM) and Random Forest (RF) classifiers without local context features.

|                      | MC data ( <b>without</b> local context features) |      |       |      |      |       |      |      |       |
|----------------------|--------------------------------------------------|------|-------|------|------|-------|------|------|-------|
|                      | NB                                               |      |       | SVM  |      |       | RF   |      |       |
| Category             | Pre.                                             | Rec. | F-me. | Pre. | Rec. | F-me. | Pre. | Rec. | F-me. |
| <b>Medical</b>       | 0.61                                             | 0.60 | 0.60  | 0.65 | 0.65 | 0.65  | 0.74 | 0.73 | 0.73  |
| <b>Social</b>        | 0.63                                             | 0.63 | 0.63  | 0.66 | 0.66 | 0.66  | 0.78 | 0.78 | 0.78  |
| <b>Psychological</b> | 0.58                                             | 0.59 | 0.59  | 0.61 | 0.61 | 0.61  | 0.73 | 0.72 | 0.71  |
| <b>Background</b>    | 0.61                                             | 0.61 | 0.61  | 0.64 | 0.64 | 0.64  | 0.77 | 0.77 | 0.77  |
| <b>Wellness</b>      | 0.63                                             | 0.63 | 0.63  | 0.68 | 0.68 | 0.68  | 0.76 | 0.75 | 0.75  |
| <b>Physical</b>      | 0.70                                             | 0.68 | 0.69  | 0.70 | 0.70 | 0.70  | 0.80 | 0.79 | 0.79  |
| <b>Previous</b>      | 0.53                                             | 0.53 | 0.53  | 0.56 | 0.56 | 0.56  | 0.61 | 0.61 | 0.61  |
| <b>Other</b>         | 0.52                                             | 0.52 | 0.52  | 0.56 | 0.55 | 0.55  | 0.59 | 0.59 | 0.59  |

**MA3 Table 2:** The performance of a different classifiers on MC data using Naïve Bayes (NB), Support Vector Machines (SVM) and Random Forest (RF) classifiers with local context features.

|                      | MC data ( <b>with</b> local context features) |      |       |      |      |       |      |      |       |
|----------------------|-----------------------------------------------|------|-------|------|------|-------|------|------|-------|
|                      | NB                                            |      |       | SVM  |      |       | RF   |      |       |
| Category             | Pre.                                          | Rec. | F-me. | Pre. | Rec. | F-me. | Pre. | Rec. | F-me. |
| <b>Medical</b>       | 0.80                                          | 0.80 | 0.80  | 0.84 | 0.84 | 0.84  | 0.90 | 0.91 | 0.90  |
| <b>Social</b>        | 0.84                                          | 0.83 | 0.83  | 0.83 | 0.83 | 0.83  | 0.85 | 0.85 | 0.84  |
| <b>Psychological</b> | 0.69                                          | 0.70 | 0.70  | 0.71 | 0.71 | 0.71  | 0.77 | 0.75 | 0.73  |
| <b>Background</b>    | 0.74                                          | 0.74 | 0.74  | 0.74 | 0.74 | 0.74  | 0.77 | 0.77 | 0.77  |
| <b>Wellness</b>      | 0.77                                          | 0.77 | 0.77  | 0.78 | 0.78 | 0.78  | 0.80 | 0.79 | 0.79  |

|                 |      |      |      |      |      |      |      |      |      |
|-----------------|------|------|------|------|------|------|------|------|------|
|                 |      |      |      |      |      |      |      |      |      |
| <b>Physical</b> | 0.80 | 0.78 | 0.79 | 0.80 | 0.80 | 0.80 | 0.82 | 0.83 | 0.83 |
| <b>Previous</b> | 0.56 | 0.56 | 0.56 | 0.57 | 0.56 | 0.56 | 0.58 | 0.58 | 0.58 |
| <b>Other</b>    | 0.84 | 0.81 | 0.82 | 0.83 | 0.84 | 0.83 | 0.84 | 0.86 | 0.85 |

**Supplement Table 3: The performance of a random forest classifier on MC using only words and bigram features, after adding topic modelling, and after adding word embedding features**

|                      | <b>MC data</b>                     |           |            |                                |           |            |                                |           |            |
|----------------------|------------------------------------|-----------|------------|--------------------------------|-----------|------------|--------------------------------|-----------|------------|
|                      | With only word and bigram features |           |            | Adding topic modeling features |           |            | Adding word embedding features |           |            |
| <b>Category</b>      | <b>Pre</b>                         | <b>Re</b> | <b>F-m</b> | <b>Pre</b>                     | <b>Re</b> | <b>F-m</b> | <b>Pre</b>                     | <b>Re</b> | <b>F-m</b> |
| <b>Medical</b>       | 0.74                               | 0.73      | 0.73       | 0.72                           | 0.71      | 0.71       | 0.73                           | 0.72      | 0.72       |
| <b>Social</b>        | 0.78                               | 0.78      | 0.78       | 0.74                           | 0.74      | 0.74       | 0.77                           | 0.79      | 0.77       |
| <b>Psychological</b> | 0.73                               | 0.72      | 0.72       | 0.71                           | 0.71      | 0.70       | 0.70                           | 0.71      | 0.70       |
| <b>Background</b>    | 0.77                               | 0.77      | 0.77       | 0.73                           | 0.73      | 0.73       | 0.75                           | 0.75      | 0.75       |
| <b>Wellness</b>      | 0.76                               | 0.75      | 0.75       | 0.74                           | 0.73      | 0.73       | 0.76                           | 0.75      | 0.75       |
| <b>Physical</b>      | 0.80                               | 0.79      | 0.79       | 0.78                           | 0.78      | 0.77       | 0.76                           | 0.76      | 0.76       |
| <b>Previous</b>      | 0.61                               | 0.61      | 0.61       | 0.59                           | 0.59      | 0.59       | 0.60                           | 0.60      | 0.60       |
| <b>Other</b>         | 0.59                               | 0.59      | 0.59       | 0.57                           | 0.57      | 0.57       | 0.59                           | 0.59      | 0.59       |
